# Supplementary material for: Evaluating the Information Content of Shallow Shotgun Metagenomics
Source: PubMed Central journal article supplement (PMC6234283; doi:10.1128/msystems.00069-18), 2018-11-13

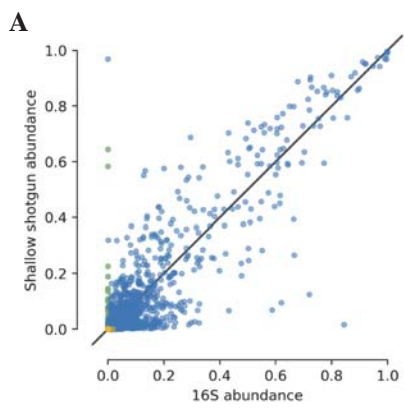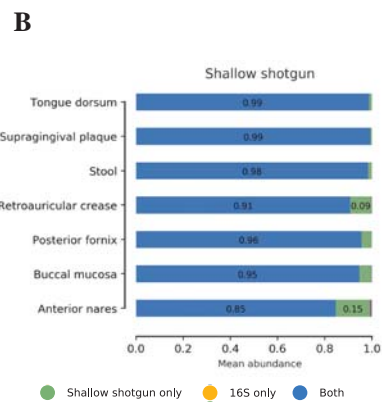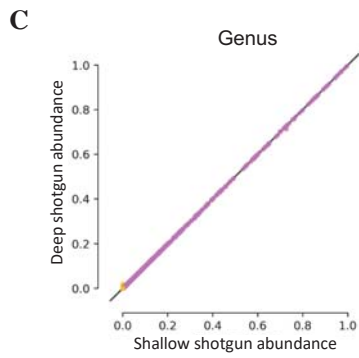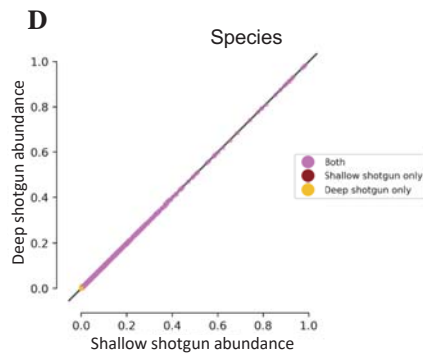

Supplement: sys005182277sf1.pdf [file sys005182277sf1.pdf]
